# Supplementary material for: Cadherin-6B proteolysis promotes the neural crest cell epithelial-to-mesenchymal transition through transcriptional regulation
Source: PubMed Central journal article supplement — J Cell Biol. 2016 Dec 5;215(5):735–47. doi: 10.1083/jcb.201604006 (PMC5146998; doi:10.1083/jcb.201604006), 2016-12-05
Supplement: JCB_201604006_sm.pdf [file JCB_201604006_sm.pdf]

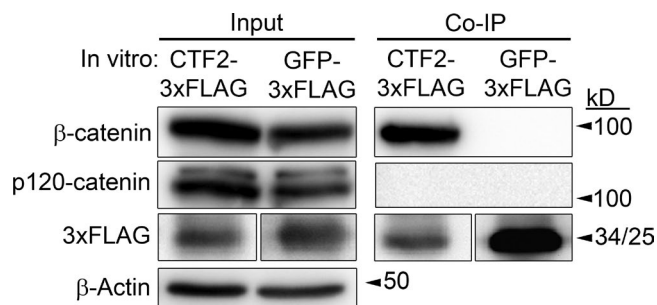

Figure S1. **Cad6B CTF2 physically associates with  $\beta$ -catenin, but not p120-catenin, in vitro.** LMH cell transfection (as in Fig. 4 G) reveals  $\beta$ -catenin coimmunoprecipitation (co-IP) after CTF2-3xFLAG, but not GFP-3xFLAG, pull-down. CTF2-3xFLAG does not coimmunoprecipitate with p120-catenin, as observed in vivo (Fig. 1 C).

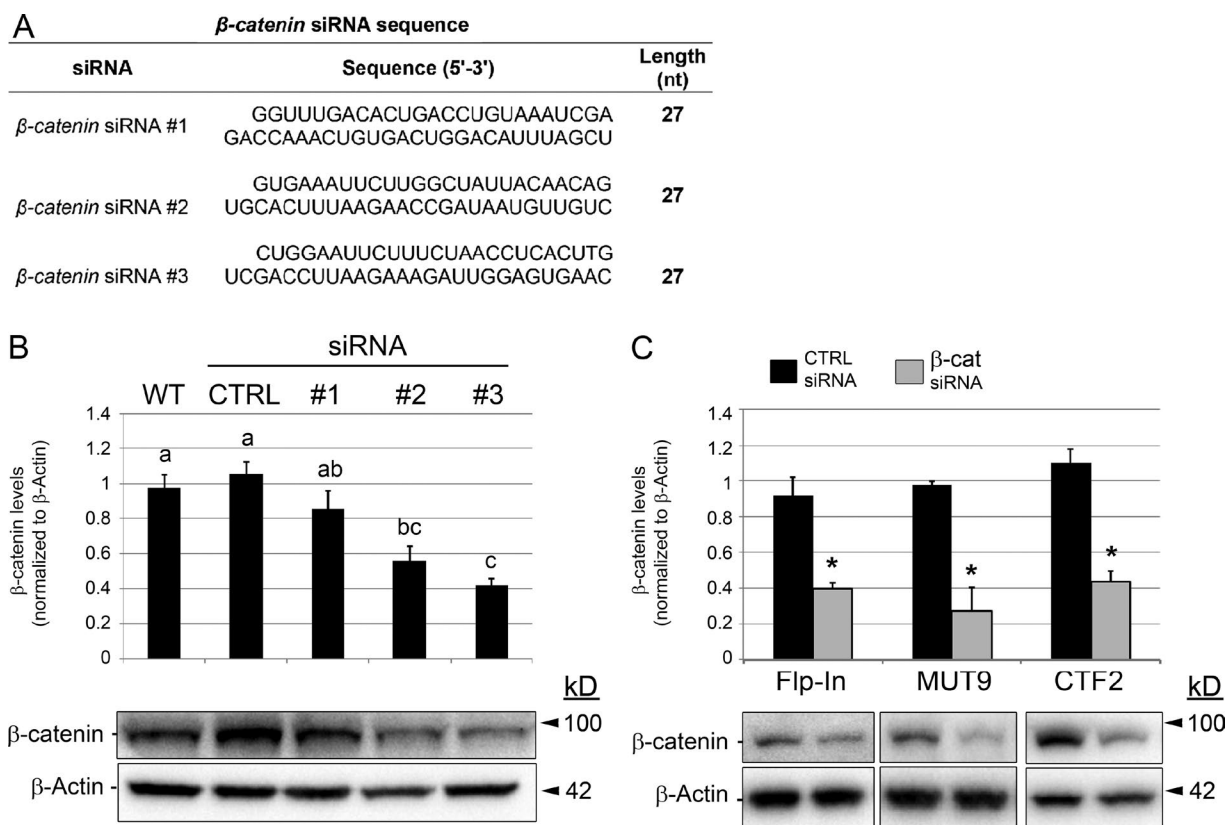

Figure S2. **Depletion of  $\beta$ -catenin from CHO cells using DsiRNAs.** (A) Sequence of the  $\beta$ -catenin DsiRNAs designed for knockdown assays. (B) Three  $\beta$ -catenin DsiRNAs were tested for knockdown efficacy in FIp-In-CHO cells. DsiRNA #1 did not produce appreciable knockdown (15%), whereas DsiRNAs #2 and #3 significantly decreased  $\beta$ -catenin protein levels compared with untransfected and negative control (CTRL) DsiRNA-treated cells (44% and 59%, respectively;  $n = 3$ ,  $P < 0.05$ ). Means that share letter superscripts are not significantly different ( $P < 0.05$ ). DsiRNA #3 was used in subsequent experiments. (C) DsiRNA #3 decreases  $\beta$ -catenin protein levels within the parental FIp-In (58%), FIp-In-Cad6B-CTF2-HA (56%), and FIp-In-Cad6B-MUT9-HA CHO cells (72%; \*,  $P < 0.05$ ;  $n = 3$ ). The degree of knockdown is not significant between cell lines ( $P < 0.22$ ). WT, wild type. Error bars show SEMs.

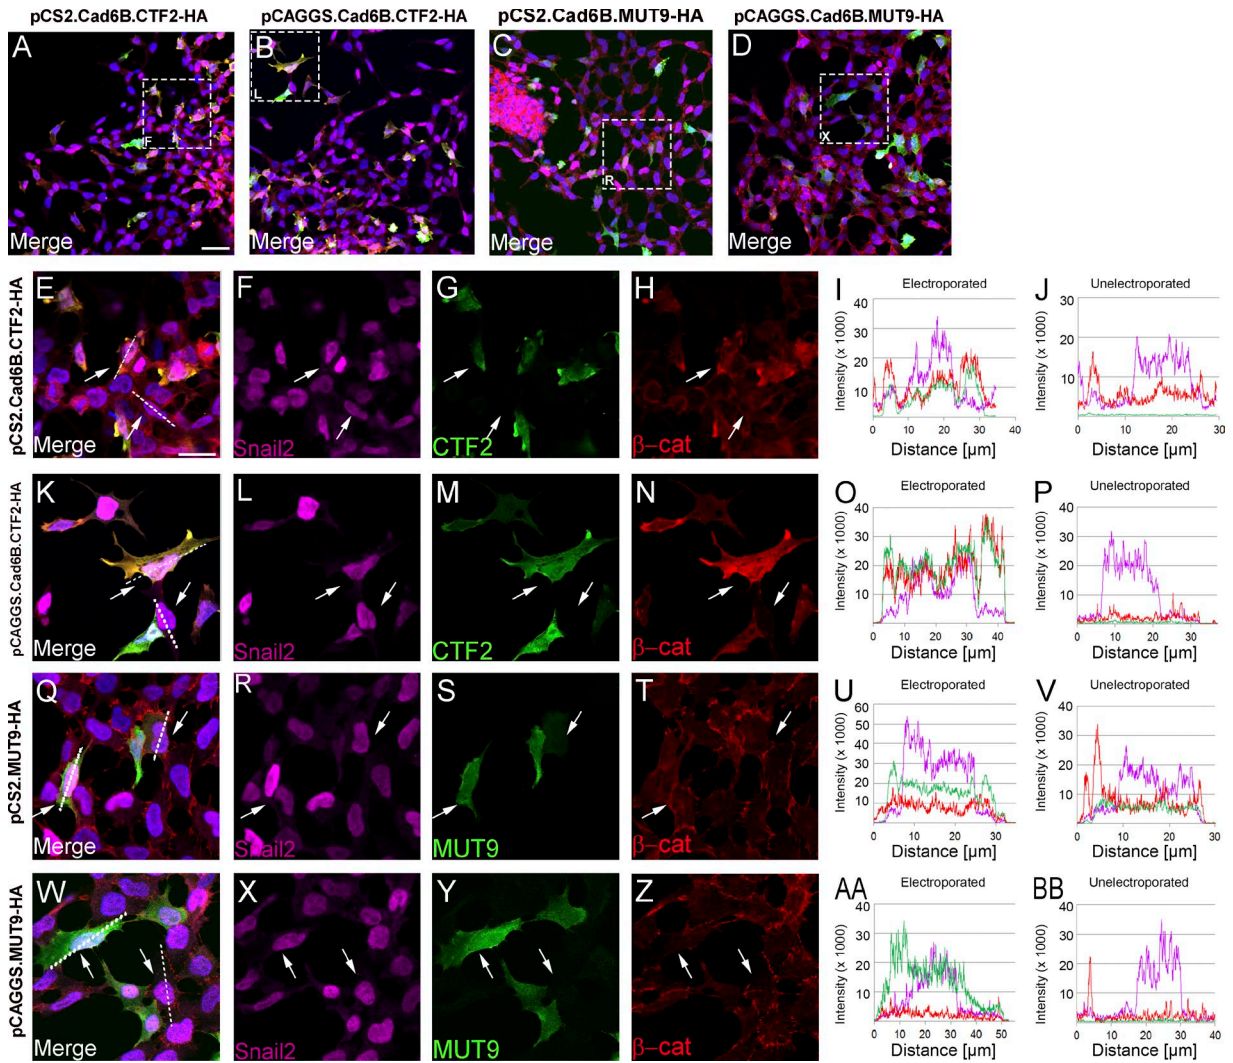

Figure S3. **Cad6B CTF2 and  $\beta$ -catenin colocalize in the cytosol and nucleus in cranial neural crest cells treated with LMB *ex vivo*.** Representative explants of neural crest cells overexpressing CTF2-HA (pCS2-CTF2-HA, A and E–H; line scans, I and J; pCAGGS-CTF2-HA, B and K–N; line scans, O and P), MUT9-HA (pCS2-MUT9-HA, C and Q–T; line scans, U and V; or pCAGGS-MUT9-HA, D and W–Z; line scans, AA and BB), followed by immunostaining for Snail2 (purple), HA (green), and  $\beta$ -catenin (red). Boxes in lower-magnification 20 $\times$  merge images (A–D) mark respective magnified (63 $\times$ ) areas (E–H, K–N, Q–T, and W–Z). Bars: (A–D) 20  $\mu$ m; (E–Z) 10  $\mu$ m. Observed phenotypes are comparable to that described in Fig. 4.

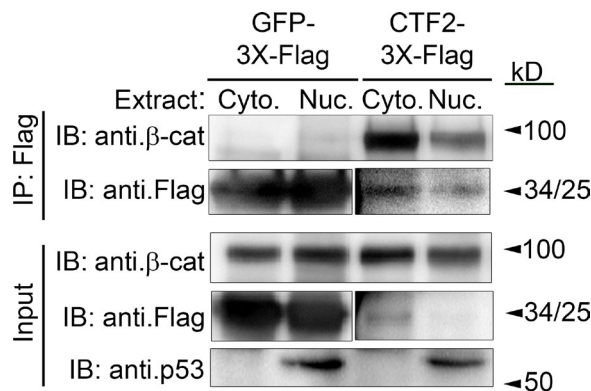

Figure S4.  **$\beta$ -Catenin is coimmunoprecipitated with CTF2-3xFLAG, but not GFP-3xFLAG, in both cytosolic and nuclear protein fractions of transfected LMH cells *in vitro*.** p53 levels (53 kD) were assessed to determine degree of nuclear protein enrichment after fractionation. IB, immunoblot; IP, immunoprecipitation.

Table S1. Primer sequences for *Snail2* promoter ChIP-QPCR (Fig. 5 C)

| <i>Snail2</i> ChIP-QPCR primer | Sequence (5'-3')        | Amplicon size |
|--------------------------------|-------------------------|---------------|
| Set #1                         |                         | nt            |
| Sense                          | CACCACTCAGTCTGTAATTTGGG | 122           |
| Antisense                      | CTGTGCTACTCTTTTGCTGTC   |               |
| Set #2                         |                         | 137           |
| Sense                          | GACAGGCAAAGAGTGACACAG   |               |
| Antisense                      | GCATACTGGTTCAGACAAGCTG  |               |
| Set #3                         |                         | 87            |
| Sense                          | ACAGCTTGTCTGAACCAGTATGC |               |
| Antisense                      | GCTGAGGGAGTAGTCTGTGG    |               |
| Set #4                         |                         | 118           |
| Sense                          | GACACTGCCCCGTAAG        |               |
| Antisense                      | GCAGATTTCAAAGGCAGCTCC   |               |
| Set #5                         |                         | 129           |
| Sense                          | GGGCTTCCCGAATAAGTCACG   |               |
| Antisense                      | CCTTAGCGGGCAGTGTGC      |               |
| Set #6                         |                         | 104           |
| Sense                          | ACGTGACTTATTCGGAAGCC    |               |
| Antisense                      | GCTCCTCGGAGTTTCAGTCTAG  |               |
| Set #7                         |                         | 129           |
| Sense                          | CTAGACTGAAACTCCGAGGAGC  |               |
| Antisense                      | GGAGGCTTTGCTTCAGGTTTC   |               |
| Set #8                         |                         | 117           |
| Sense                          | GAAACCTGAAGCAAAGCCTCC   |               |
| Antisense                      | CTGCTCCTCAATCACTTCTGG   |               |
| Set #9                         |                         | 97            |
| Sense                          | CCAGAAGTGATTGGAGGAGCAG  |               |
| Antisense                      | GTGTAGTGGCACTGCAGAGG    |               |
| Set #10                        |                         | 117           |
| Sense                          | CCTGACTTGGGGTATTTACG    |               |
| Antisense                      | CGCACACTATCACTGCCGAG    |               |
| Set #11                        |                         | 105           |
| Sense                          | CAATGCGATAGGGACCGATG    |               |
| Antisense                      | TGAAGGCAGGCTTCTCCTTC    |               |
